# Supplementary material for: Experimental and theoretical evidence for cyclic selenurane formation during selenomethionine oxidation
Source: Royal Society of Chemistry journal article supplement (doi:10.1039/b513238j), 2005-01-01

**Supplementary Material for ‘Experimental and Theoretical Evidence for Cyclic  
Selenurane Formation During Selenomethionine Oxidation’**

Authors, Ritchey, Davis, Pleban, Bayse

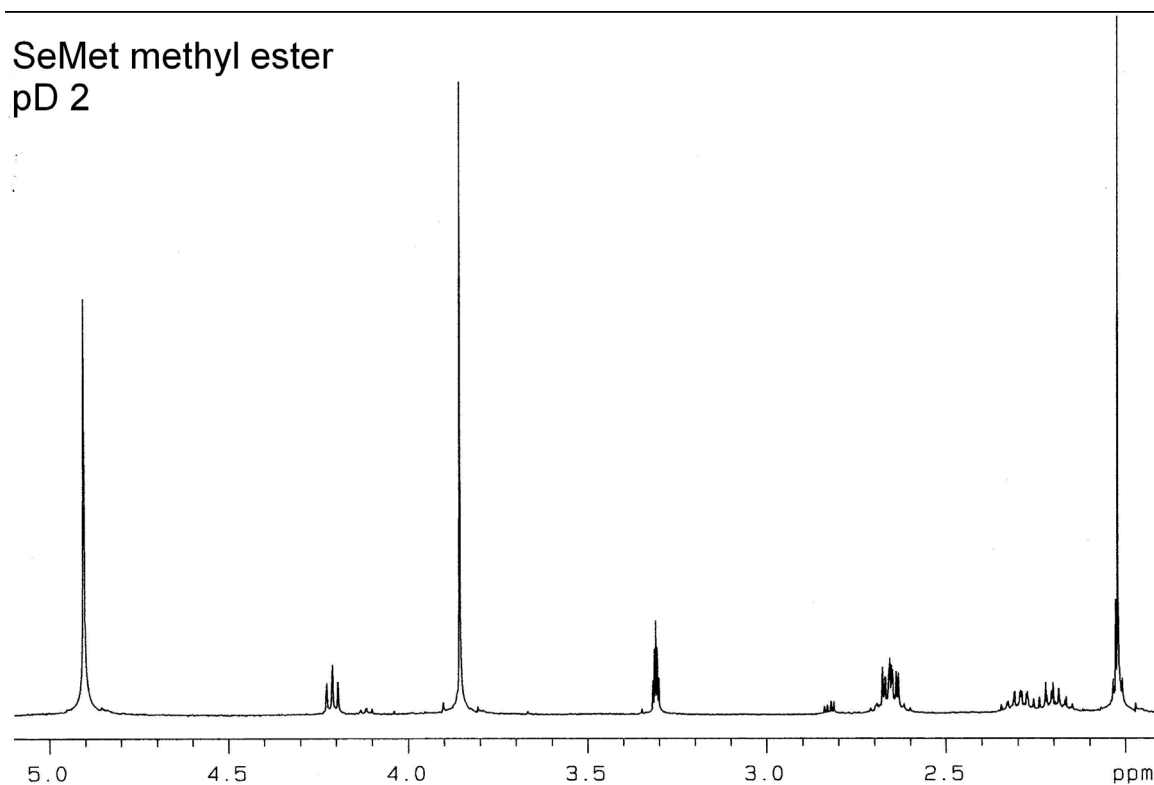

SeMet methyl ester  
pD 2

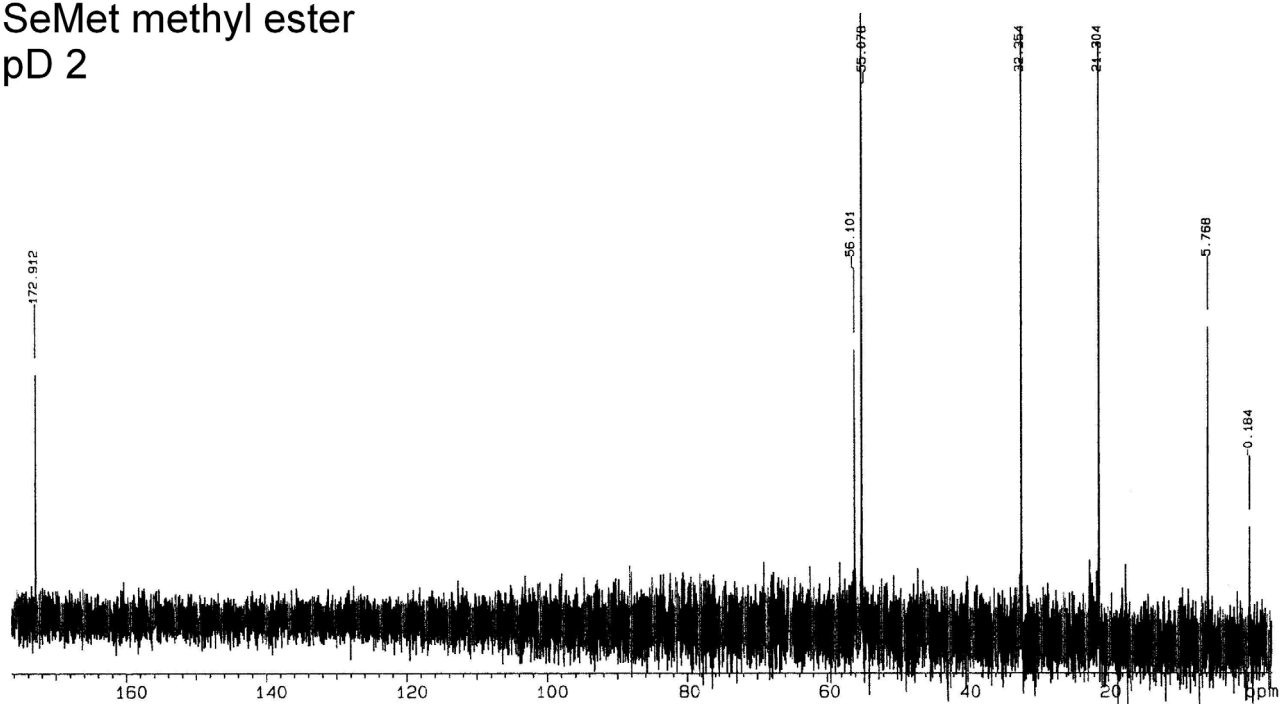

SeMet methyl ester pD 2

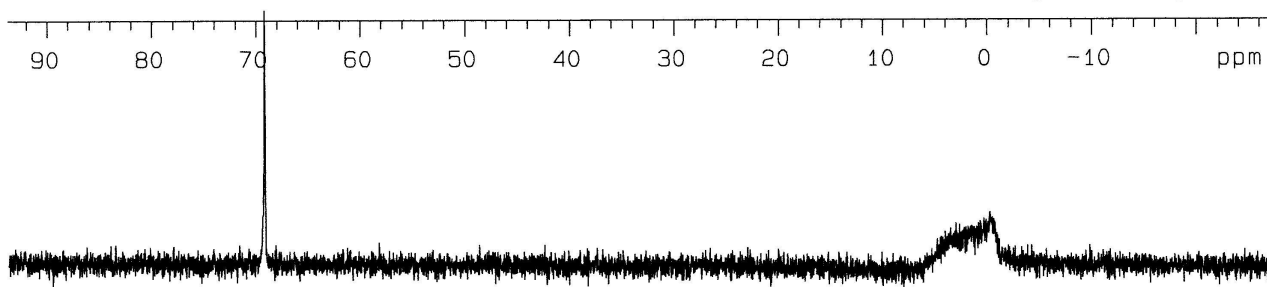

N-Formyl SeMet  
pD 4

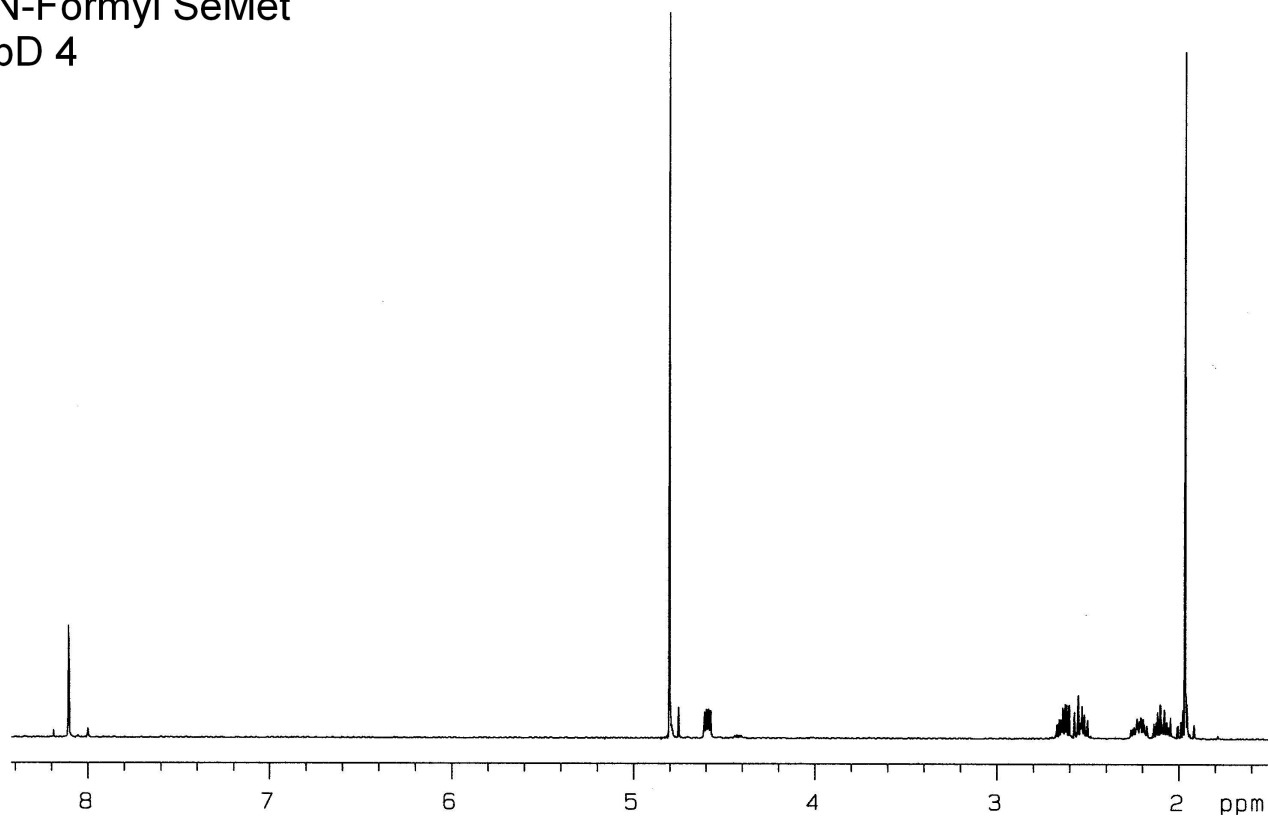

N-Formyl SeMet  
pD 4

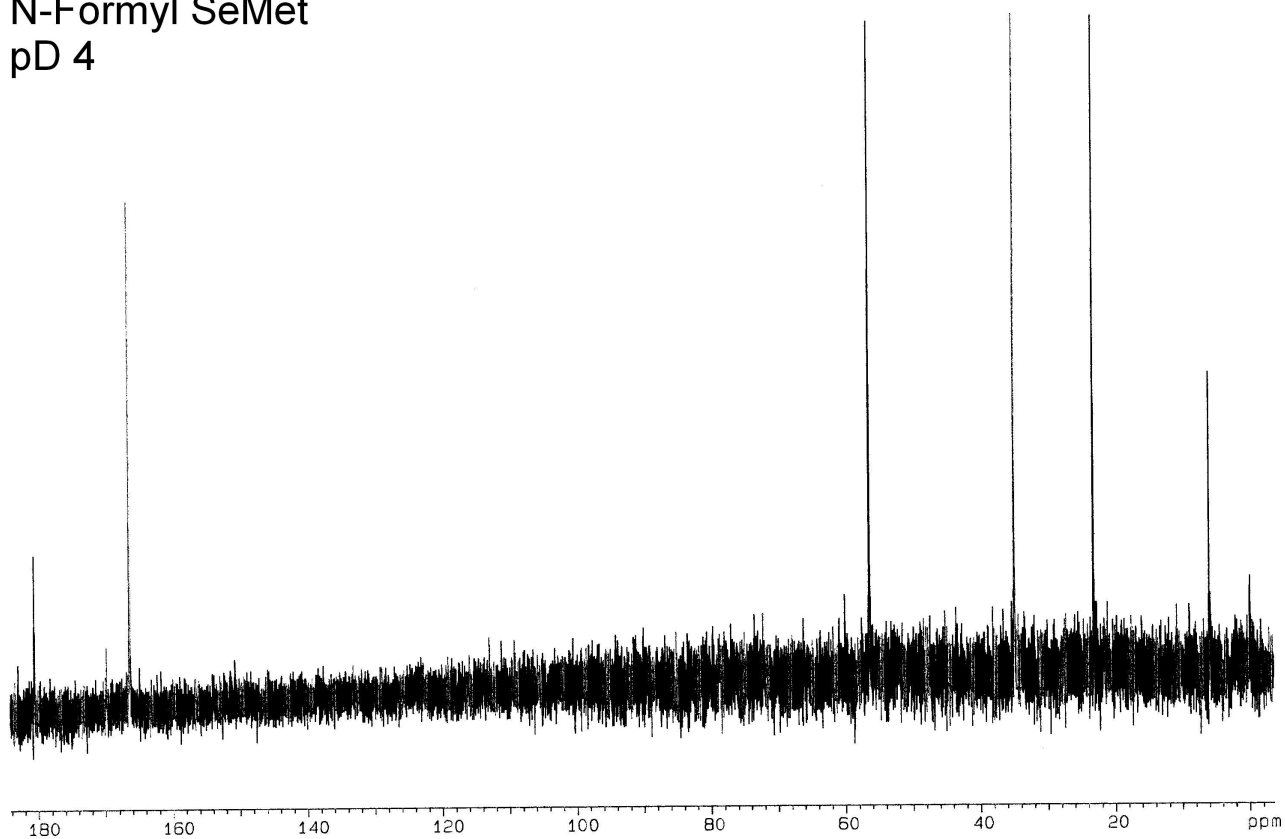

N-Formyl SeMet  
pD 4

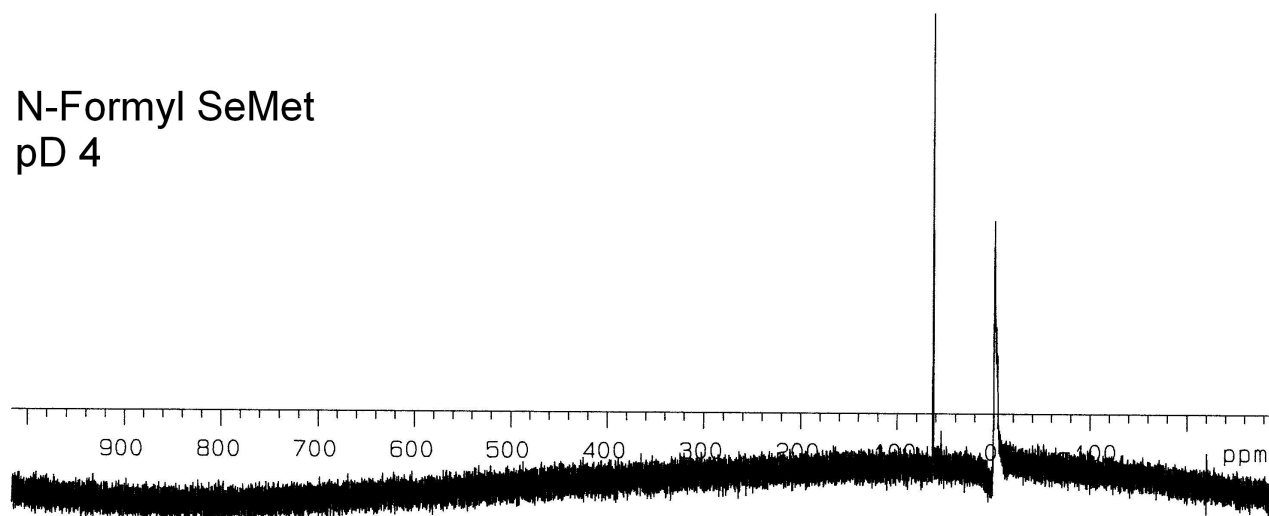

SeMet oxidized pD 6

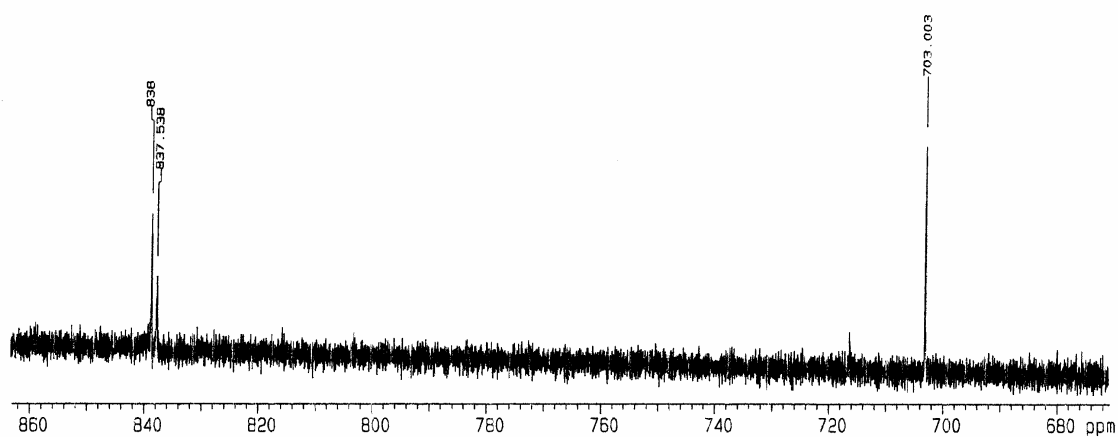

SeMet oxidized pD 12

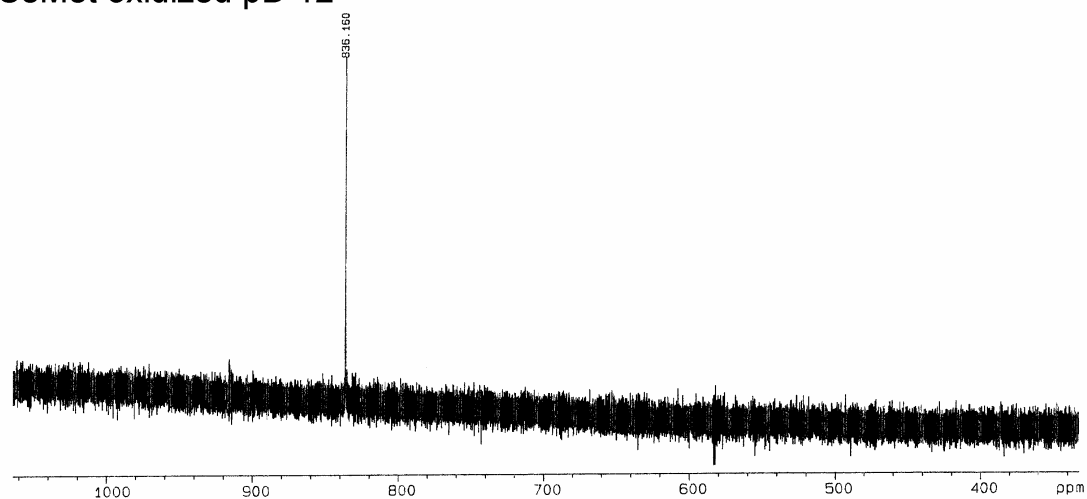

Attached Proton Test  
SeMet oxidized pD 11

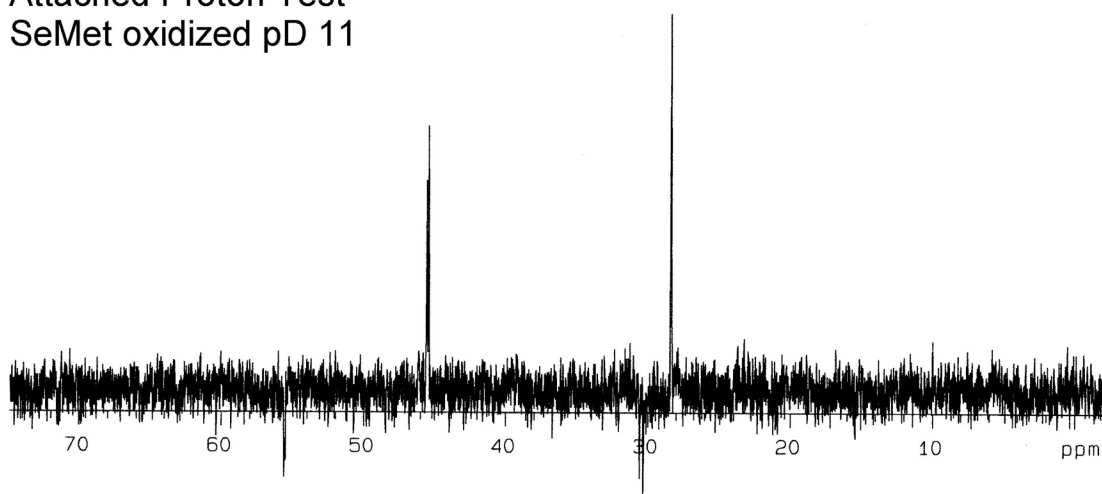

# SeMet oxidized pD 8 COSY

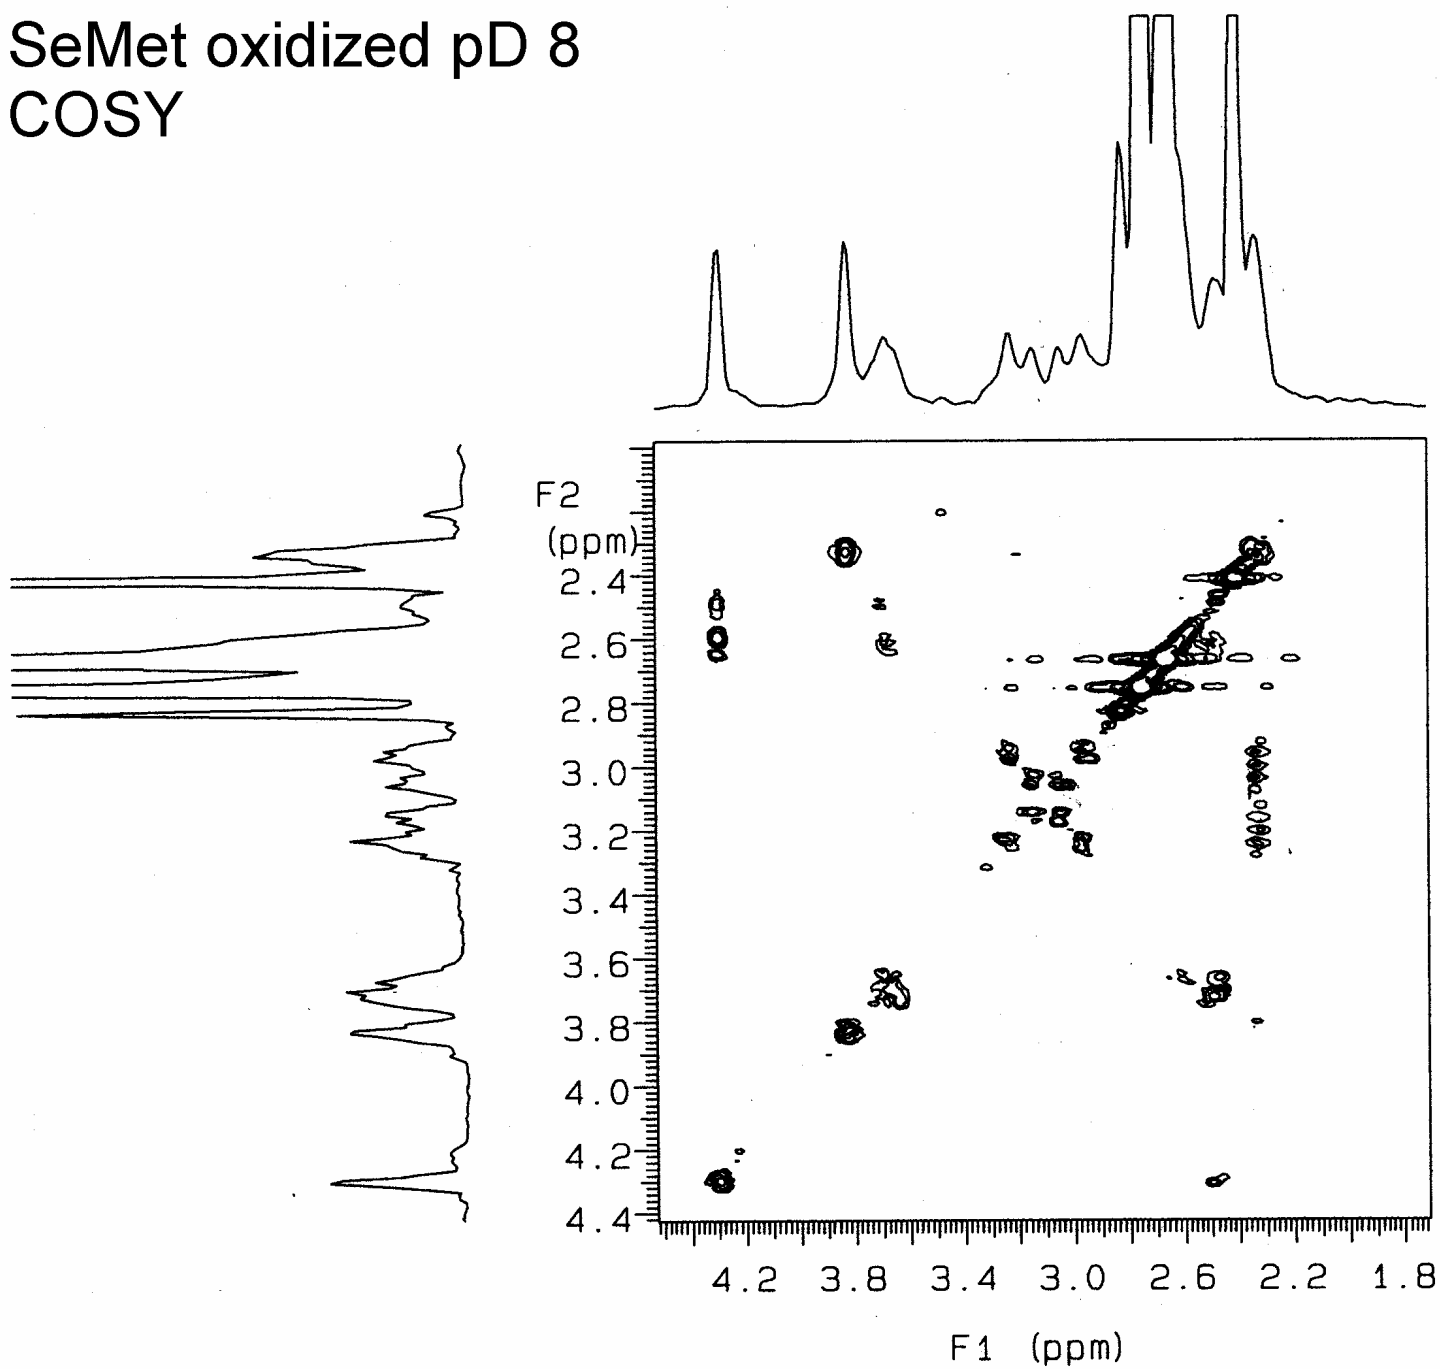

## SeMet oxidized pD 8 HETCOR

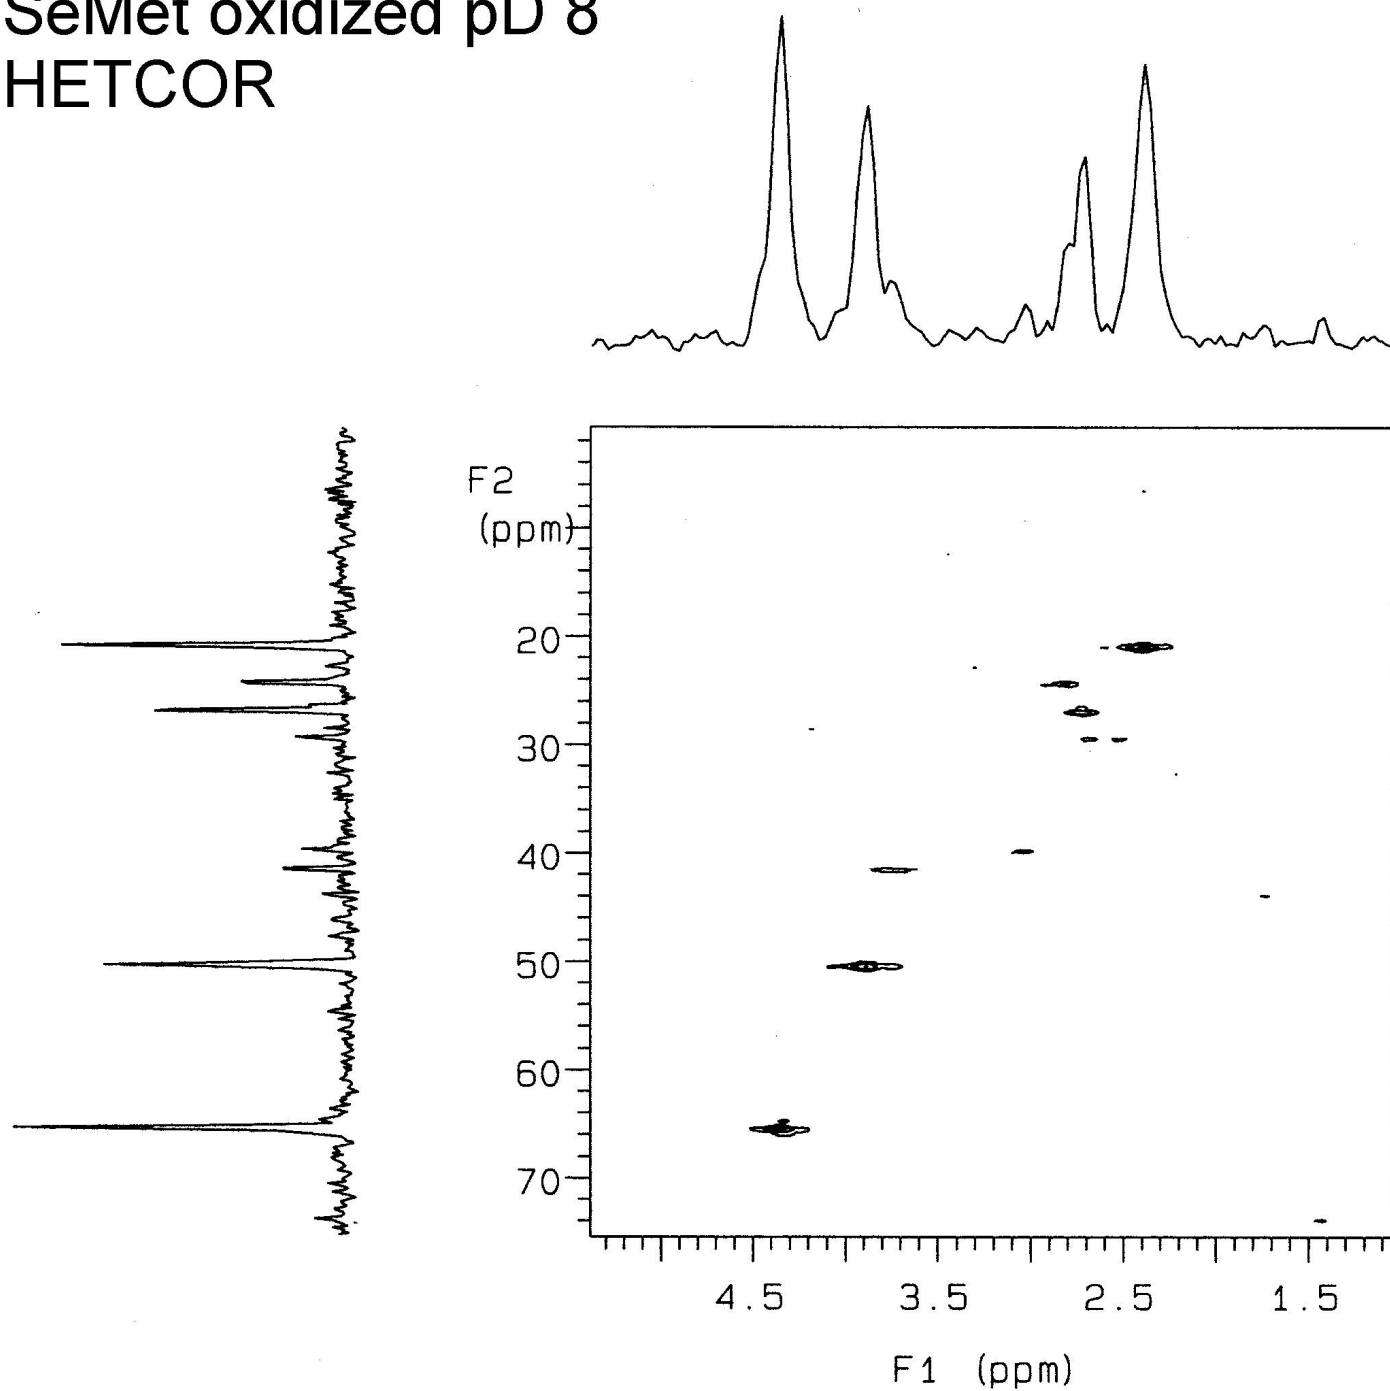

SeMet oxidized pD 11  
COSY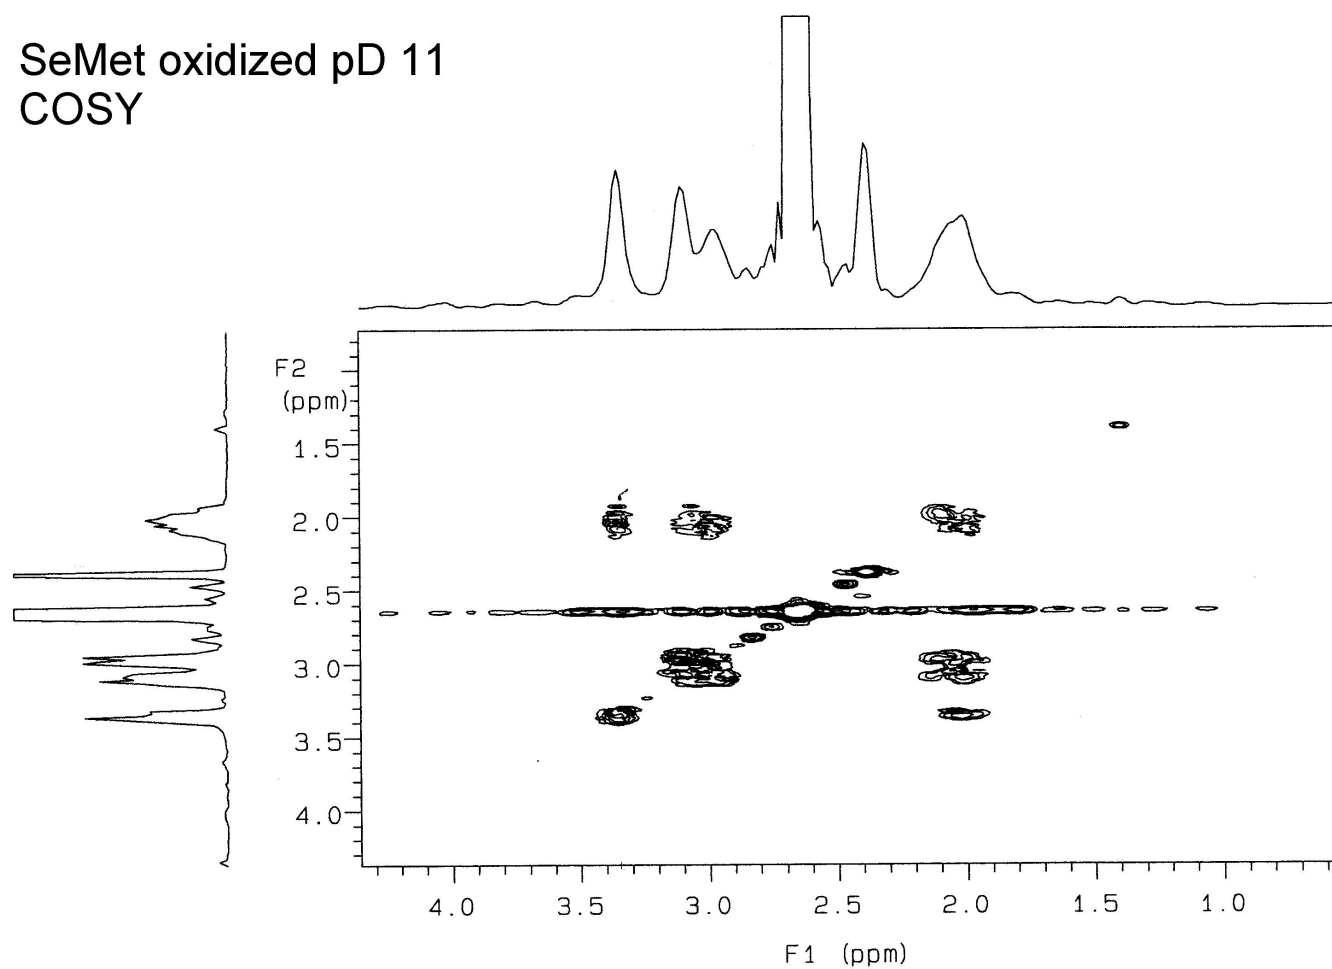



## SeMet methyl ester Oxidized COSY

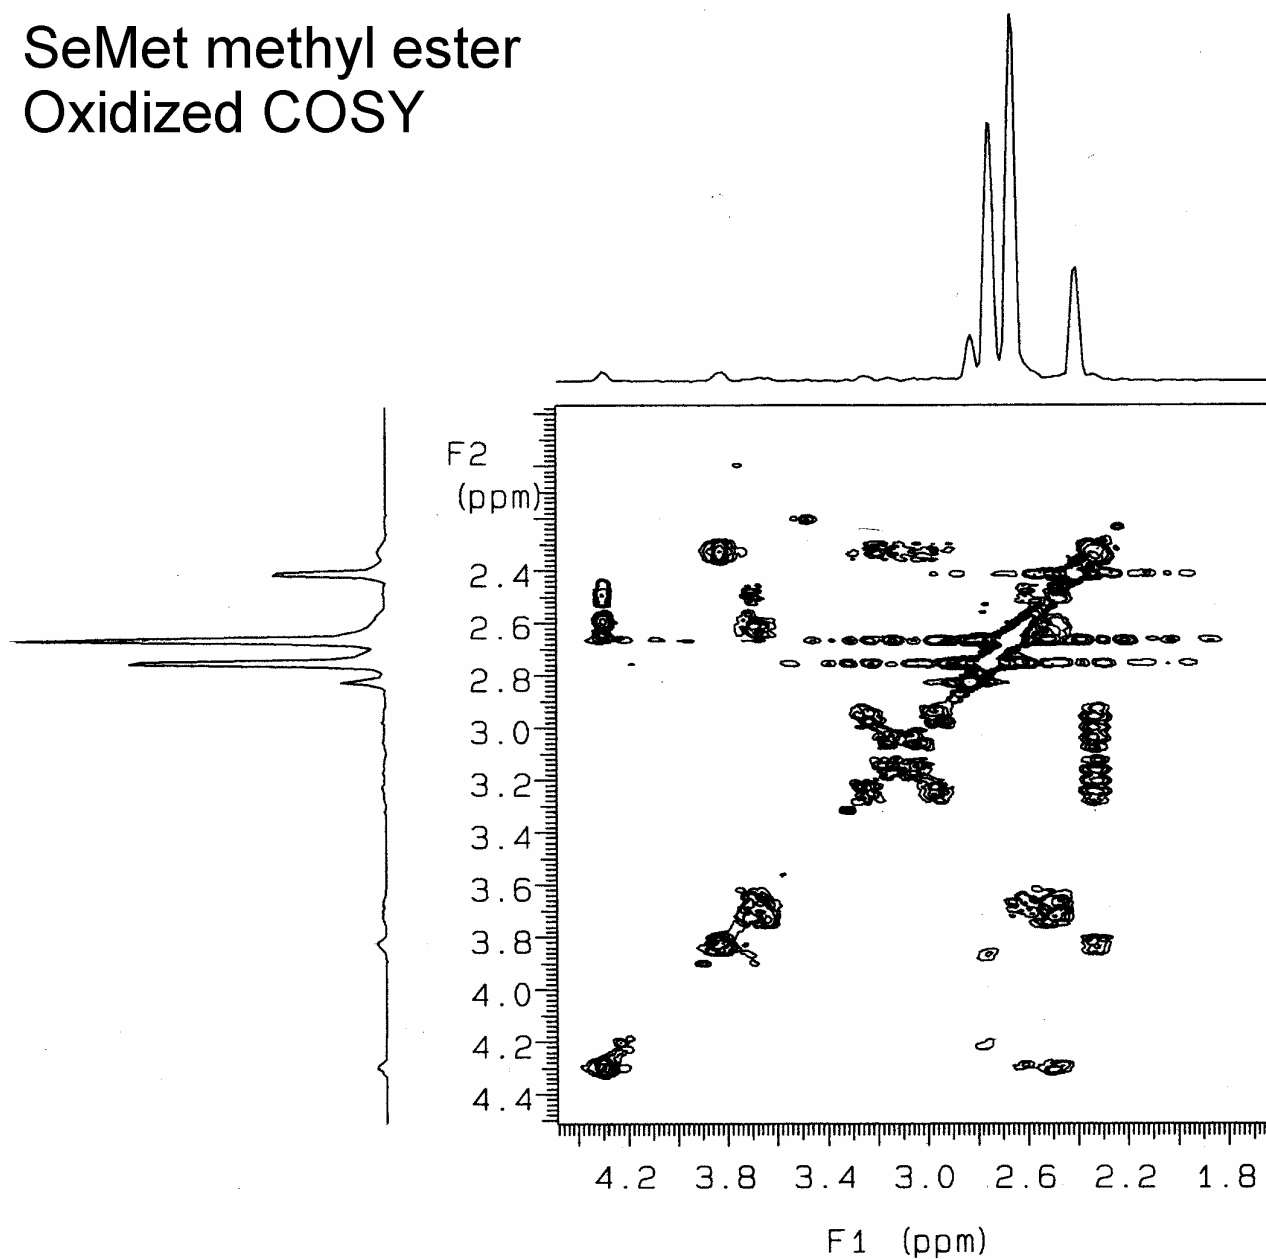

## N-Formyl SeMet Oxidized COSY

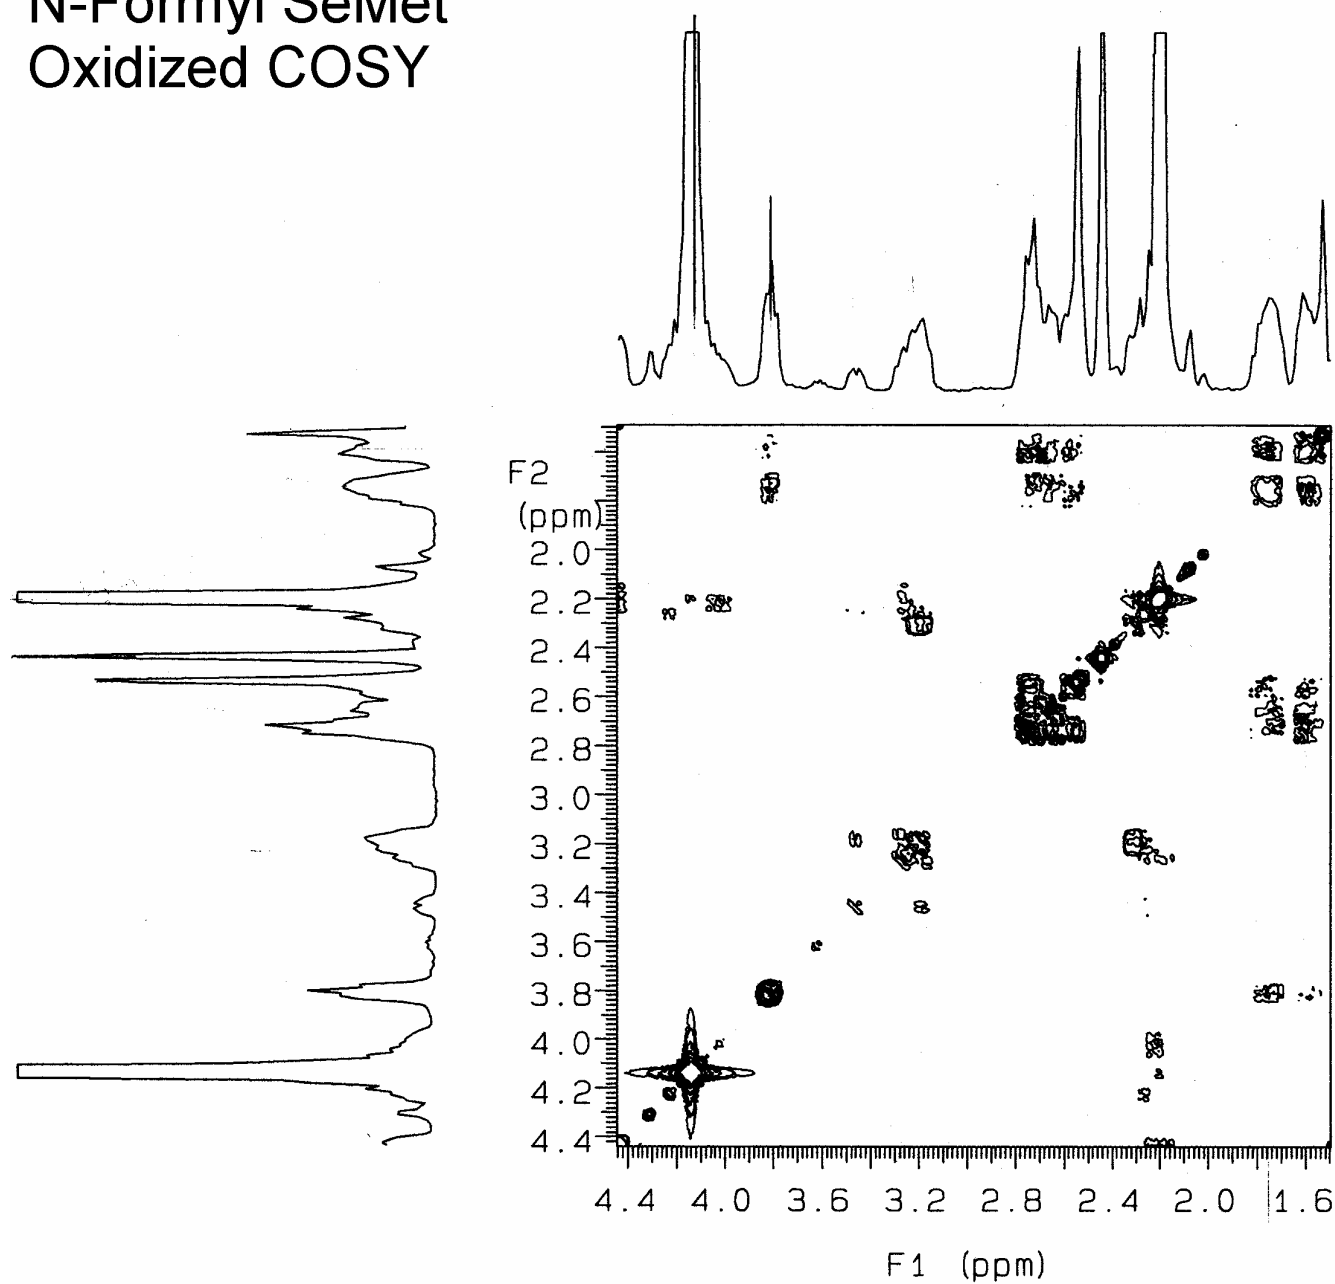

SeMet oxidized at pD 12  
then pD adjusted to pD 7  
Reformation of selenurane

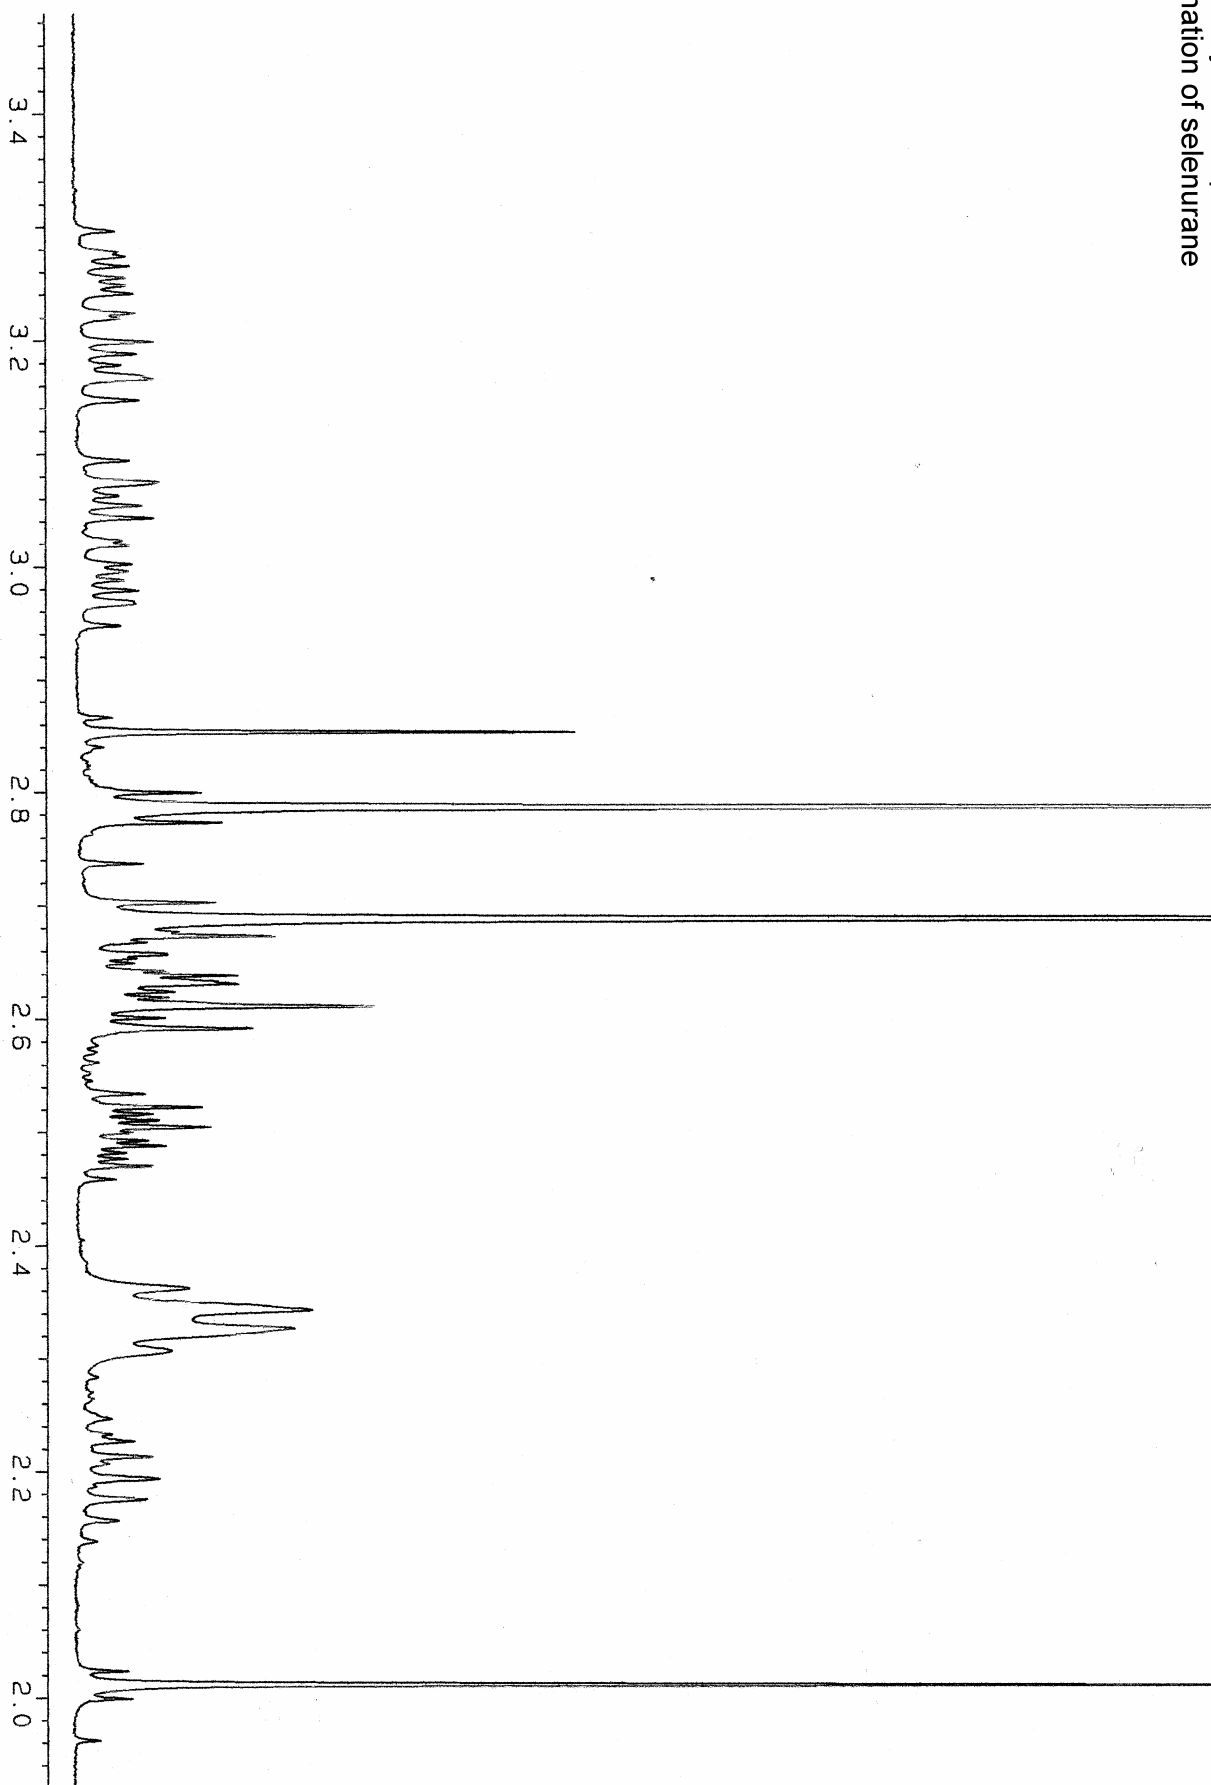

## SeMet oxidized pD 5

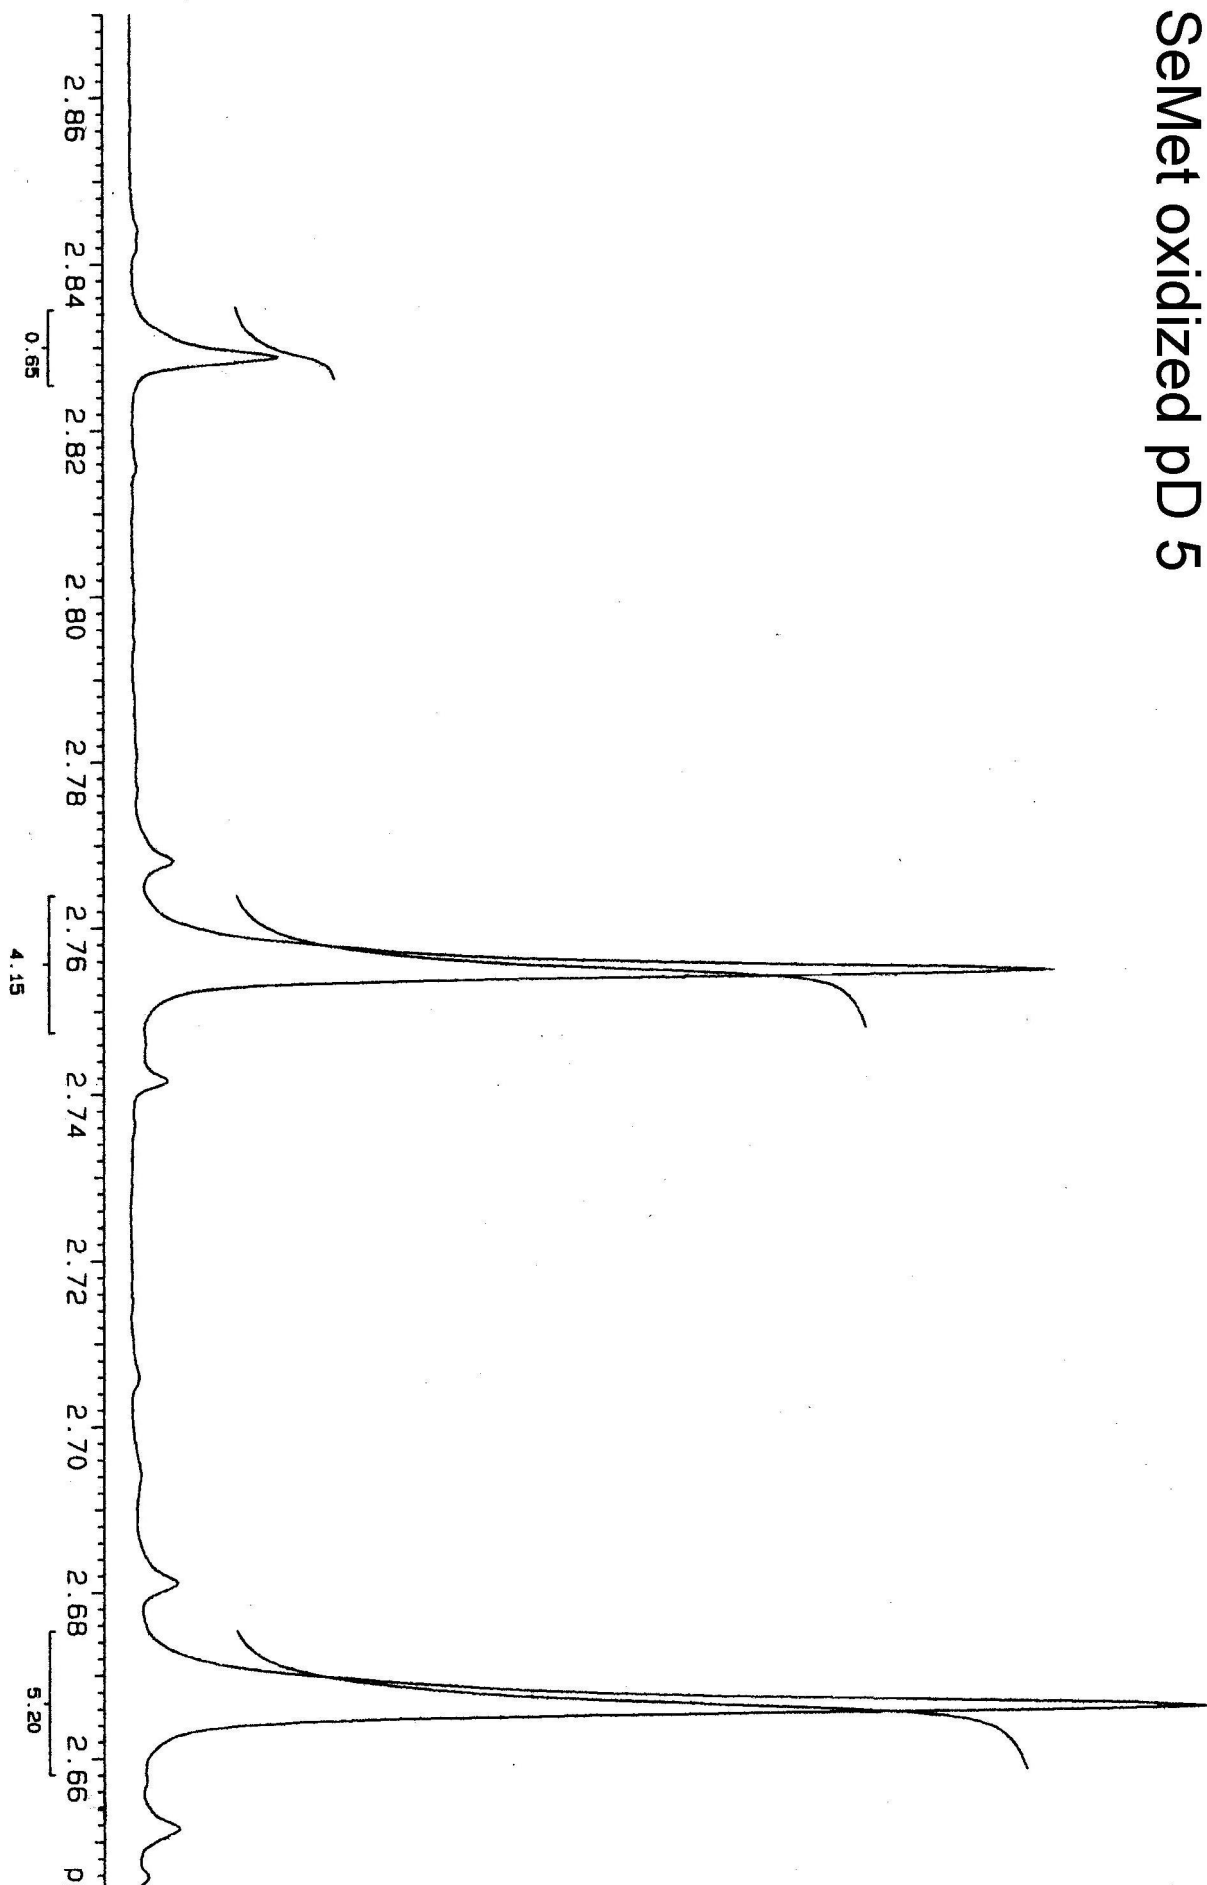

Supplement: b513238j.pdf [file b513238j.pdf]
